# Supplementary material
Source: PubMed Central journal article supplement (PMC5637179)
Supplement: JB.00281-17_zjb020174542s1.pdf [file JB.00281-17_zjb020174542s1.pdf]

# The TetR family transcriptional regulator PccD negatively controls propionyl coenzyme A assimilation in *Saccharopolyspora erythraea*

Zhen Xu<sup>1</sup>, Miao-Miao Wang<sup>1</sup> and Bang-Ce Ye<sup>1,2\*</sup>

<sup>1</sup>Lab of Biosystems and Microanalysis, State Key Laboratory of Bioreactor Engineering, East China University of Science and Technology, Shanghai 200237, China.

<sup>2</sup>School of Chemistry and Chemical Engineering, Shihezi University, Xinjiang 832000, China.

**Table S1.** The oligonucleotides used in this study

| Oligonucleotides                                                            | Sequence (5' to 3')                       |
|-----------------------------------------------------------------------------|-------------------------------------------|
| <b>Primers for real-time RT-PCR</b>                                         |                                           |
| RT0026F                                                                     | CCGCTGGTCACCTTCGTAGACA                    |
| RT0026R                                                                     | ATCACCGAGTAGTAGGCGTTCTCC                  |
| RT3241F                                                                     | ACCGACCTGAAGACGCCGT                       |
| RT3241R                                                                     | TAGGACCTGCCGACCATGTAGC                    |
| RT3398F                                                                     | ACATGCTGCTCGACGAGGGTT                     |
| RT3398R                                                                     | CGGTCTTCATCGCCAGGTCCAT                    |
| RT3400F                                                                     | GTCGTATCTGGACATCGGCAAGG                   |
| RT3400R                                                                     | AGCGAACGCCACCACCTCAT                      |
| RT3856F                                                                     | GGTGATCTCGCTGGTGGCTTCA                    |
| RT3856R                                                                     | AACTTGCCCTCGGCGGTGAA                      |
| RT4237F                                                                     | AGGCAGCGTTCCAGACCAA                       |
| RT237R                                                                      | ACCTTCTGGCGGTAGCTGTTCA                    |
| RT6509F                                                                     | GTCGTATCTGGACATCGGCAAGG                   |
| RT6509R                                                                     | AGCGAACGCCACCACCTCAT                      |
| RT7038F                                                                     | GCTGACCGTCACCTACCAGGAA                    |
| RT7038R                                                                     | GTGTGCTCCATCTTCATCGCCTC                   |
| RT3396F                                                                     | ACTCCTACATCACCTTCGCCTACG                  |
| RT3396R                                                                     | GGCATCGGTGCGGAACATCA                      |
| RT3398F                                                                     | ACATGCTGCTCGACGAGGGTT                     |
| RT3398R                                                                     | CGGTCTTCATCGCCAGGTCCAT                    |
| RT3400F                                                                     | GTCGTATCTGGACATCGGCAAGG                   |
| RT3400R                                                                     | AGCGAACGCCACCACCTCAT                      |
| <b>Construction of the pET-<i>pccD</i> plasmids for PccD overexpression</b> |                                           |
| <i>pccR</i> -F                                                              | GGAATTCATATGatggccgcagcaggcagcaagggg      |
| <i>pccR</i> -R                                                              | ATTGGATCCCTACCCATAAGTGAATGCCCGATAGGCATCGG |
| <b>Primers for PCR amplification of EMSAs probe with biotin labeling</b>    |                                           |
| EMSA3398F                                                                   | AGCCAGTGGCGATAAGCAAGTGCCTGGGGGCGCGGCTTTAG |

---

|           |                                                   |
|-----------|---------------------------------------------------|
| EMSA3398R | <u>AGCCAGTGGCGATAAGCGTGGTTGCGCCGGTAGAGGTCGG</u>   |
| EMSA3400F | <u>AGCCAGTGGCGATAAGAGCAATCCCCGCGGAGCTAGGAGC</u>   |
| EMSA3400R | <u>AGCCAGTGGCGATAAGATGTCCAGATACGACTCCGCCCGCTC</u> |

**Synthesized short biotin-labeled ssDNA containing PccD-binding site**

|                    |                                                        |
|--------------------|--------------------------------------------------------|
| M- <i>pccA</i> -F  | AGCCAGTGGCGATAAG <u>ATGACGGTGTGTG</u> CTTATCGCCACTGGCT |
| M- <i>pccA</i> -R  | AGCCAGTGGCGATAAG <u>ACAACACCGTCAT</u> CTTATCGCCACTGGCT |
| M- <i>pccBC</i> -F | AGCCAGTGGCGATAAG <u>TTGACGCTGCTGAC</u> TTATCGCCACTGGCT |
| M- <i>pccBC</i> -R | AGCCAGTGGCGATAAG <u>TCAGCAGCGTCAACT</u> TATCGCCACTGGCT |

**Construction of the *pccD* in-frame deletion mutant**

|            |                                                 |
|------------|-------------------------------------------------|
| pUC3396upF | <u>CCCAAGCTT</u> ATGACCGCGAACTCCGAGACGCTCGAC    |
| pUC3396upR | G <u>CTCTAGAGT</u> GCCGGTAGAGCGCGGAGGGC         |
| pUC3396dwF | CG <u>GGGTACCG</u> TTTCATCGACATCCTGGTCACCGAGGTC |
| pUC3396dwR | CC <u>GGAATTC</u> GCGCGATGATGCCGTTCCACTCCTGC    |

**Construction of the *pccD* overexpression strain**

|           |                                                          |
|-----------|----------------------------------------------------------|
| 3396overF | GGAATTC <u>CATATG</u> atggccgcagcaggcagcaagggg           |
| 3396overR | ATAAGAAT <u>GCGGCC</u> CCTACCATAAGTGAATGCCCGATAGGCATCGGT |

**Construction of T-vector pMD-18T plasmid with the promoter region of SACE\_3398**

|              |                           |
|--------------|---------------------------|
| pMD18T-3398F | CAAGTGCCTGGGGGCGCGCTTTAG  |
| pMD18T-3398R | GCGGTGGTGTGGATGTCCGGTGCCT |

**Primers for mutant confirmation by DNA sequencing**

|           |                                    |
|-----------|------------------------------------|
| Qc3396JLF | TGTGCCGAAAGGGTGGGAATG              |
| Qc3396JLR | TCTCCTGGCTCGTTGCGGATGA             |
| UPF       | GTACGCGTTGAGGTGACCAGGAACTGCGG      |
| Ut1       | CAGAACATACCGGTCCGCTCATCGACTCCTCG   |
| Dt1       | CGGAGAGAACGACGGGAAGGGAGAAGACGTAACC |
| DWR       | CACCCAGGTTGATGTCCGCCACCGAGG        |

**Primers for Identification of co-transcription of of *S. erythraea* acyl-CoA carboxylases.**

|                |                        |
|----------------|------------------------|
| sqRT0026/0027F | TCGTGGACGGCGTGGTTCG    |
| sqRT0026/0027R | CGAAGGGTGGCGAGGCTGTC   |
| sqRT0027/0028F | GTCGAGGAGGTGTGACCGTGTT |
| sqRT0027/0028R | GCGGCTCCGATGATGTTGGG   |
| sqRT3241/3242F | RT3241/3242F           |
| sqRT3241/3242R | RT3241/3242R           |
| sqRT3398/3399F | RT3398/3399F           |
| sqRT3398/3399R | RT3398/3399R           |
| sqRT3399/3400F | CGCACCTCCGCCCTTCCC     |
| sqRT3399/3400R | GCACGAACACCGCATCCAC    |
| sqRT6509/6510F | RT6509/6510F           |
| sqRT6509/6510R | RT6509/6510R           |
| sqRT7038/7039F | RT7038/7039F           |
| sqRT7038/7039R | RT7038/7039R           |

---

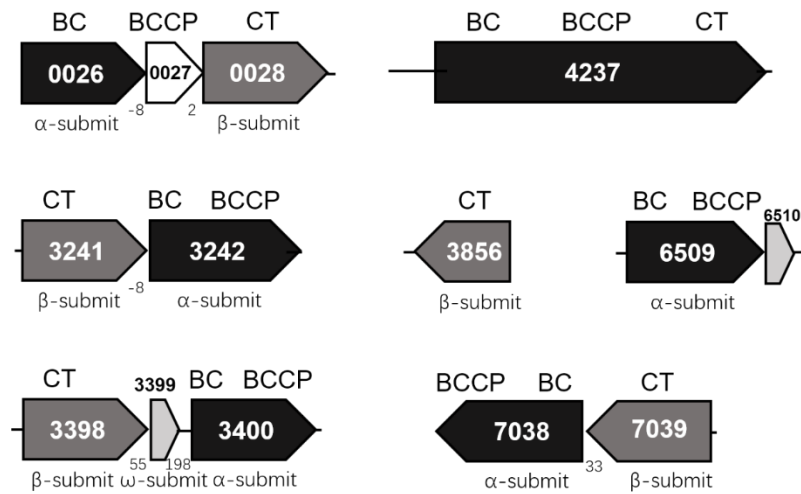

**Figure S1.** Genetic organization of monocistronic or operon of *S. erythraea* acyl-CoA carboxylases. The letters BC, BCCP, CT refer to the biotin carboxylase, biotin carboxy carrier protein, and carboxytransferase activities respectively.

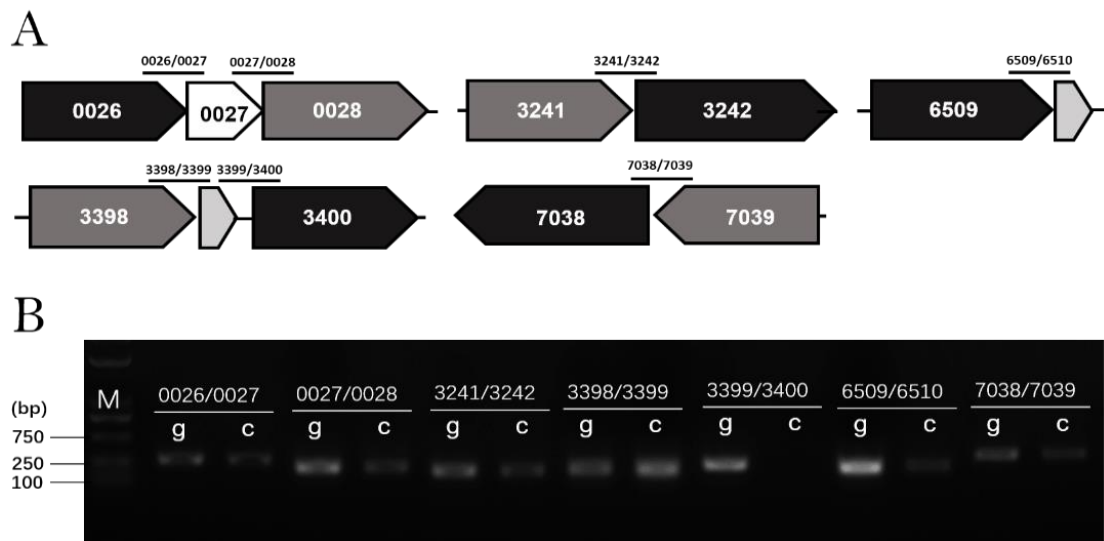

**Figure S2.** Identification of co-transcription of of *S. erythraea* acyl-CoA carboxylases.

**A.** Alignment of the selected acyl-CoA carboxylases locus. Primers were design cross subunit genomic DNA as indicated above the gene structure schematic.

**B.** Identification of the co-transcription of regions indicated in (A). Genomic DNA (g) was used as a positive control, and cDNA (c) was reverse transcribed from RNA extracted from WT cultured in TSB and subjected to semi-quantitative RT-PCR, PCR products were evaluated on 1% agarose gels.

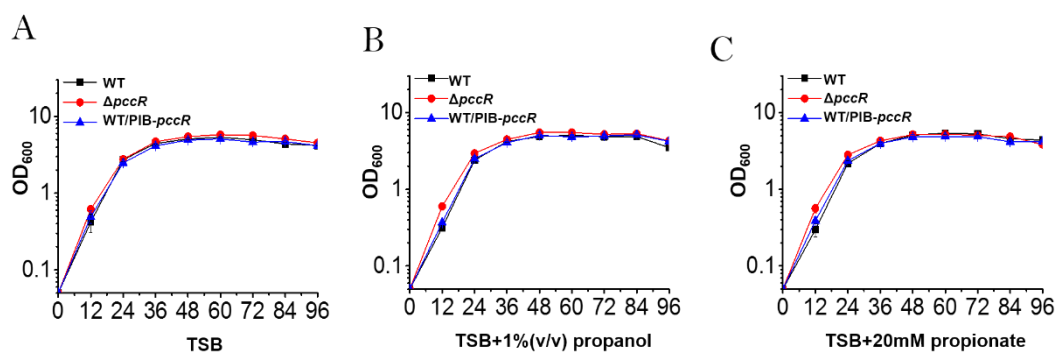

**Figure S3.** Growth curves of *S. erythraea* strains WT,  $\Delta pccD$  and WT/PIB-*pccD* grown on TSB liquid media (A), TSB supplemented with 1% (v/v) propanol (B) and TSB supplemented with 20 mM propionate (C).

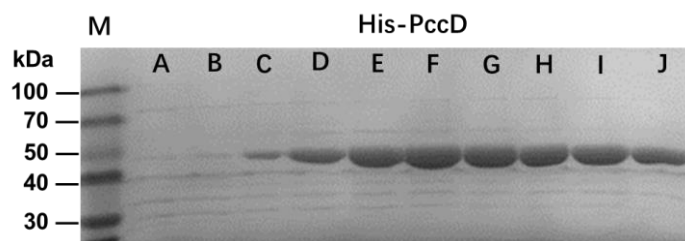

**Figure S4.** Purification of Histidine tagged PccD. His-PccD was purified by Ni-NTA Superflow column (Qiagen), and eluted with 5 mL buffer containing 250 mM imidazole. A-J refer to every 0.5 mL eluate collected constantly. The protein in fraction G, H and I were used for the gel shift assay.

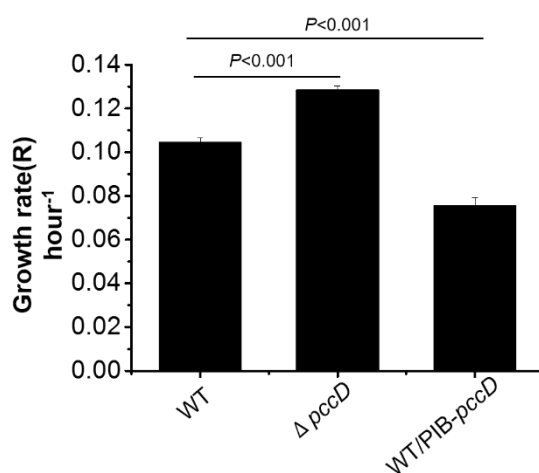

**Figure S5.** The growth rates of *S. erythraea* strains WT,  $\Delta pccD$ , and WT/PIB-*pccD* grown on the Evans medium supplemented with 20 mM sodium propionate as the sole carbon source. Error bars indicate standard deviation from three biological replicates.

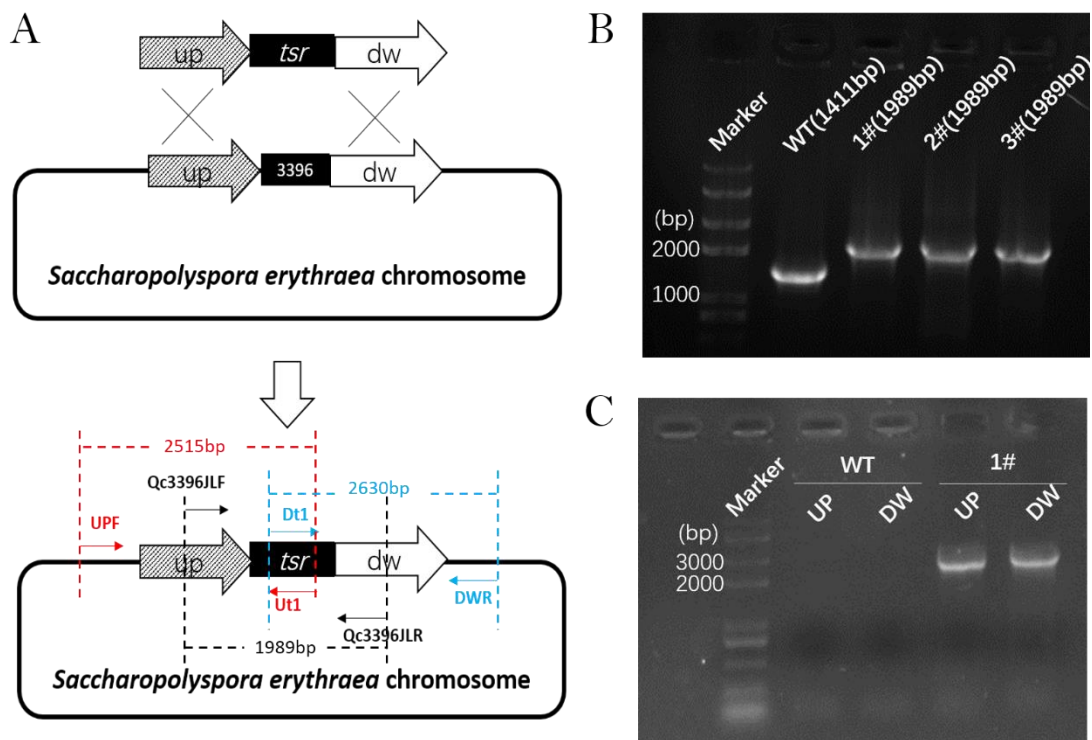

**Figure S6. Identification of *pccD*-deleted mutant.**

**A.** Strategy of double crossover gene knock-out method for *pccD* (SACE\_3396).

**B.** PCR screening of intergrant clones using primer Qc3396JLF/R.

**C.** PCR screening of double-exchange clones using primer UPF/Ut1 and primer Dt1/DWR.
